# Supplementary material for: The age distribution of mortality due to influenza: pandemic and peri-pandemic
Source: BMC Med. 2012 Dec 12;10:162. doi: 10.1186/1741-7015-10-162 (PMC3554498; doi:10.1186/1741-7015-10-162)
Supplement: Additional file 2 — XS mortality rates fitted to an exponential model. This Microsoft Excel file contains estimates for the coefficients of an exponential fit to every season for which data were available for each of the six countries studied. [file 1741-7015-10-162-S2.XLS]

## Sheet: Australia
	excess All-Cause mortality rate/100,000 age-specific population
year\Age	50	57.5	62.5	67.5	72.5	77.5	82.5	90	R-squared	p-value	exp coeff	LB	UB	mult coeff
1968	0.0143229	0.0299013	0.0542034	0.0808016	0.204902	0.344575	0.692233	1.52995	0.99462	4.8763e-08	0.12032	0.11148	0.12916	-10.3949
1969	0.0123513	0.0257435	0.066115	0.105666	0.125997	0.296695	0.516071	0.939217	0.987348	6.35919e-07	0.109738	0.0973291	0.122148	-9.81021
1970	0.0161265	0.0508926	0.0718709	0.12939	0.223631	0.392563	0.507695	0.880911	0.983115	1.51386e-06	0.0992836	0.086286	0.112281	-8.82743
1971	0.0124741	0.0240977	0.0413351	0.076106	0.153015	0.245854	0.453552	0.889306	0.996736	1.08841e-08	0.110822	0.104486	0.117157	-10.015
1972	0.00708547	0.0190082	0.0413845	0.0764132	0.120083	0.266822	0.453716	0.894721	0.994587	4.96765e-08	0.122452	0.113428	0.131477	-10.9481
1973	0.00180257	0.0121987	0.0405716	0.0578193	0.0915592	0.17749	0.359089	0.930879	0.962934	1.61399e-05	0.144997	0.11658	0.173415	-12.8993
1974	0.0115341	0.0291948	0.0596332	0.0973709	0.163685	0.333982	0.639625	1.28462	0.997701	3.80152e-09	0.11884	0.113141	0.124539	-10.3498
1975	0.00740723	0.0114489	0.031807	0.0530129	0.105073	0.18362	0.355966	0.700613	0.990604	2.60142e-07	0.120251	0.108552	0.13195	-11.0547
1976	0.00696545	0.0266663	0.0502253	0.0784684	0.152566	0.296649	0.479939	1.31166	0.993769	7.57957e-08	0.125958	0.115994	0.135921	-11.0277
1977	0.00652652	0.0173479	0.0325628	0.0659666	0.118529	0.211146	0.403962	0.870851	0.998418	1.23897e-09	0.123398	0.118491	0.128306	-11.1331
1978	0.00229808	0.0123895	0.0289322	0.0496411	0.118483	0.167708	0.402404	0.594999	0.968895	9.51612e-06	0.137367	0.11278	0.161954	-12.4107
1979	0.00377627	0.0131114	0.0264308	0.0440055	0.0852242	0.157845	0.324524	0.646903	0.99458	4.98624e-08	0.127706	0.118288	0.137123	-11.7568
1980	0.00432067	0.0174108	0.0267849	0.0735749	0.0767644	0.165805	0.328666	0.71175	0.983432	1.43014e-06	0.123304	0.107317	0.139292	-11.3239
1981	0.00762141	0.0102292	0.0241815	0.0625345	0.0863318	0.164705	0.341637	0.66703	0.983905	1.31089e-06	0.119991	0.104661	0.135322	-11.1101
1982	0.00352239	0.0153097	0.0264163	0.0614398	0.11208	0.229396	0.414071	1.06248	0.993983	6.82249e-08	0.139893	0.12902	0.150766	-12.3842
1983	0.00434653	0.0119241	0.0184562	0.0360631	0.097271	0.168894	0.314434	0.697186	0.994541	5.09426e-08	0.130538	0.120877	0.140199	-11.9888
1984	0.00275557	0.00163842	0.0271685	0.0526758	0.0924624	0.157351	0.250428	0.625758	0.900945	0.000315725	0.150266	0.100493	0.200039	-13.6363
1985	0.00473821	0.0147503	0.0231505	0.0636976	0.103228	0.23827	0.437679	0.966708	0.995119	3.64168e-08	0.135301	0.125835	0.144767	-12.0527
1986	0.00290458	0.00375013	0.0240779	0.0393955	0.0730849	0.12972	0.245722	0.556338	0.964921	1.36704e-05	0.138632	0.112227	0.165037	-12.8338
1987	-0.000618615	0.0131835	0.0133423	0.0289849	0.0714091	0.117429	0.237274	0.60896	0.981609	1.56763e-05	0.126584	0.106666	0.146502	-11.9229
1988	0.00305808	0.00855709	0.0140723	0.0310658	0.0661572	0.165249	0.276938	0.566094	0.993451	8.79745e-08	0.135957	0.12493	0.146983	-12.5989
1989	0.00372359	0.0196893	0.0348325	0.0512976	0.11632	0.244193	0.440179	1.09574	0.98822	5.13068e-07	0.136712	0.121802	0.151622	-12.0871
1990	0.00181386	0.00137396	0.0143107	0.0428516	0.0525465	0.127232	0.219216	0.520476	0.930451	0.00010799	0.156354	0.113652	0.199056	-14.3795
1991	0.000222697	0.0049475	0.0187773	0.025041	0.0539175	0.124204	0.229079	0.432349	0.912608	0.000215794	0.174101	0.120282	0.227921	-15.7745
1992	0.00321072	0.00405983	0.0209439	0.0397553	0.0780461	0.151643	0.27035	0.646989	0.973998	5.5483e-06	0.141522	0.118423	0.16462	-12.9714
1993	0.00101075	0.00641554	0.0160561	0.0337194	0.053896	0.107455	0.204609	0.478556	0.974062	5.50733e-06	0.146999	0.123036	0.170962	-13.6577
1994	0.00183199	0.00934404	0.0127521	0.0378618	0.0555895	0.146925	0.239277	0.739465	0.990067	3.07368e-07	0.145324	0.130783	0.159864	-13.3165
1995	0.00371003	0.00641732	0.0185719	0.0139377	0.0484233	0.104144	0.205172	0.536535	0.970091	8.45604e-06	0.128353	0.10584	0.150866	-12.2848
1996	0.000514458	0.00903942	0.0197242	0.0382748	0.0636675	0.16927	0.28256	0.645891	0.938588	7.41091e-05	0.164144	0.122202	0.206087	-14.7025
1997	0.000783153	0.0100053	0.0196494	0.0271686	0.0711244	0.136184	0.320503	0.757953	0.96229	1.70001e-05	0.159807	0.128205	0.191409	-14.3545
1998	0.00328902	0.00361908	0.0123344	0.0270109	0.0558812	0.117457	0.237478	0.581789	0.979876	2.56611e-06	0.141033	0.120843	0.161223	-13.1662

## Sheet: Canada
	excess all-cause mortality rate/100,000 age-specific population
Year\Age	52.5	62	67	72.5	77.5	82.5	90	R-squared	p-value	exp coeff	LB	UB	mult coeff	dominant virus
50/51	0.0140772	0.0433443	0.066741	0.157181	0.337416	0.684405	1.30485	0.993369	1.21839e-06	0.125712	0.113905	0.137519	-10.9311	H1
51/52	0.0106577	0.0149265	0.0429604	0.0572085	0.144307	0.29163	0.583835	0.968246	6.17133e-05	0.115024	0.0910771	0.13897	-10.9186	B
52/53	0.00385901	0.0188135	0.0332103	0.106548	0.162595	0.34875	0.808762	0.992215	1.82079e-06	0.143235	0.128649	0.157821	-12.9197	H1
53/54	0.00482586	0.0247943	0.0357	0.0680758	0.114103	0.135617	0.45888	0.976589	2.87137e-05	0.112849	0.0927625	0.132935	-10.9827	B
54/55	0.00626296	0.0270601	0.0291699	0.060973	0.169125	0.22714	0.627859	0.983659	1.1658e-05	0.121078	0.103138	0.139018	-11.3935	B
55/56	0.00690416	0.0172481	0.0385903	0.0878224	0.153157	0.238506	0.625867	0.994627	7.19876e-07	0.122596	0.112238	0.132955	-11.4704	H1
56/57	0.00247118	0.0176965	0.0249526	0.0339038	0.0899448	0.198684	0.322915	0.969894	5.39806e-05	0.127178	0.10142	0.152937	-12.336	B
57/58	0.0095005	0.0364791	0.0684262	0.0856435	0.14206	0.251139	0.532573	0.984928	9.52097e-06	0.102584	0.0879958	0.117173	-9.82472	H2
58/59	0.0083722	0.026046	0.0661871	0.107578	0.179546	0.325915	0.735095	0.993438	1.18696e-06	0.118969	0.107854	0.130084	-10.9258	H2
59/60	0.00499006	0.0215549	0.0377999	0.0544456	0.0771778	0.25272	0.376732	0.975092	3.35436e-05	0.113902	0.0929745	0.13483	-11.0914	B
60/61	0.00261199	0.0184515	0.0079025	0.070004	0.116705	0.206063	0.57937	0.93109	0.000434098	0.14497	0.0996314	0.190309	-13.5401	B
61/62	0.0030139	0.0195077	0.0488353	0.0779727	0.1261	0.289812	0.631946	0.978297	2.37457e-05	0.137959	0.114337	0.161581	-12.6596	H2
62/63	0.0067411	0.0290381	0.0335189	0.101361	0.182901	0.322717	0.735174	0.989666	3.6998e-06	0.125871	0.111085	0.140658	-11.5439	H2
63/64	0.00499674	0.00906988	0.0174938	0.0508803	0.116896	0.157197	0.389817	0.976712	2.83364e-05	0.124598	0.10248	0.146715	-12.1082	B
64/65	0.0017825	0.0110088	0.0229219	0.0507135	0.103934	0.195192	0.431193	0.988821	4.50433e-06	0.145341	0.127576	0.163107	-13.6542	B
65/66	0.00218873	0.0195459	0.0369608	0.0481276	0.112308	0.246848	0.435803	0.964528	8.15011e-05	0.136081	0.106081	0.166082	-12.7699	indeterm
66/67	0.00341706	0.00895486	0.0142848	0.0149346	0.0406222	0.0911428	0.256828	0.961204	0.000102084	0.113226	0.0870756	0.139376	-11.8391	indeterm
67/68	0.00325512	0.017246	0.0425806	0.0688928	0.151094	0.279481	0.74398	0.992151	1.85813e-06	0.141638	0.127155	0.15612	-12.9219	H2
68/69	0.0078833	0.0497658	0.0593773	0.103431	0.113237	0.106871	0.321885	0.87934	0.00179674	0.0840365	0.0482502	0.119823	-8.6908	H3
69/70	0.0101755	0.0340237	0.0640122	0.0926691	0.159618	0.164235	0.370423	0.970091	5.30983e-05	0.0915914	0.0731032	0.11008	-9.12729	H3
70/71	0.00223103	0.0173178	0.0210925	0.0482563	0.115161	0.194502	0.450993	0.981203	1.65595e-05	0.138415	0.116391	0.16044	-13.0602	indeterm
71/72	0.0105835	0.0318374	0.0575537	0.10384	0.190877	0.198558	0.453562	0.982022	1.48101e-05	0.0989437	0.0835534	0.114334	-9.57791	H3
72/73	0.00863726	0.0305717	0.0440604	0.0820189	0.142952	0.266694	0.468286	0.994394	8.00392e-07	0.106944	0.0977133	0.116175	-10.2557	indeterm
73/74	0.000631572	0.00361532	0.0292627	0.0532625	0.0601987	0.13554	0.280278	0.925586	0.000527126	0.162658	0.109638	0.215679	-15.3669	B
74/75	0.00675171	0.0209249	0.0431283	0.0786975	0.14188	0.289442	0.555475	0.997129	1.50153e-07	0.119702	0.112317	0.127086	-11.2365	indeterm
75/76	0.00670293	0.0152501	0.045133	0.0815766	0.114392	0.279941	0.664293	0.988996	4.33015e-06	0.124736	0.10961	0.139862	-11.644	H3
76/77	0.0110164	0.0356385	0.0373389	0.0825883	0.0937065	0.211322	0.347701	0.978917	2.20797e-05	0.0908595	0.0755307	0.106188	-9.19993	indeterm
77/78	0.00670205	0.02362	0.0586384	0.104659	0.127028	0.238017	0.664716	0.984534	1.0156e-05	0.117895	0.100908	0.134882	-11.0246	H3
78/79	0.00133376	0.00537557	0.0216823	0.0240727	0.0545844	0.161746	0.28855	0.976635	2.85724e-05	0.145975	0.120019	0.171931	-14.1381	H1
79/80	0.00142694	0.00542112	0.0208891	0.0502055	0.103851	0.160716	0.413787	0.981029	1.69451e-05	0.155325	0.130494	0.180155	-14.5587	B
80/81	0.00175381	0.0153944	0.0230733	0.0325067	0.0814599	0.141894	0.521846	0.975824	3.11267e-05	0.140308	0.11492	0.165697	-13.3591	H3
81/82	0.00405556	0.0058308	0.0117573	0.0364434	0.0645791	0.140691	0.330807	0.967616	6.48332e-05	0.12748	0.10067	0.154291	-12.6366	B
82/83	0.00423203	0.0163772	0.0305876	0.0512165	0.114251	0.211041	0.600726	0.997859	7.2077e-08	0.130237	0.123302	0.137172	-12.2737	H3
83/84	0.00243126	0.0111061	0.0234061	0.0454585	0.0632918	0.117913	0.405561	0.989003	4.32269e-06	0.129894	0.114148	0.14564	-12.6636	indeterm
84/85	0.00479281	0.0123816	0.0230785	0.047682	0.066202	0.177289	0.418374	0.992073	1.90483e-06	0.120156	0.107809	0.132503	-11.7736	H3
85/86	0.00401247	0.0126156	0.0289581	0.0582257	0.131454	0.219608	0.530134	0.996823	1.93359e-07	0.133185	0.124541	0.141829	-12.5121	B
86/87	0.00343564	0.00354753	0.0107774	0.0234524	0.0446428	0.126937	0.304884	0.949848	0.00019478	0.131951	0.097095	0.166807	-13.2119	H1
87/88	0.000349382	0.00729926	0.0285637	0.0522542	0.0741513	0.156469	0.465464	0.924941	0.000538763	0.181578	0.122114	0.241042	-16.6103	B
88/89	0.00535668	0.0066888	0.0100136	0.0309891	0.0606273	0.144383	0.327313	0.942901	0.000270093	0.120948	0.0867325	0.155164	-12.1599	H1
89/90	0.00388834	0.0139007	0.0238563	0.0588987	0.110402	0.180482	0.529462	0.998146	5.02993e-08	0.13055	0.124081	0.137018	-12.391	H3
90/91	-0.000529184	0.00496163	0.0103526	0.0158128	0.0511908	0.0785114	0.334188	0.984486	9.07237e-05	0.148399	0.122538	0.17426	-14.6064	B
91/92	0.000822607	0.0111209	0.0224331	0.0497089	0.0747928	0.132311	0.397131	0.954157	0.000155349	0.154051	0.115233	0.19287	-14.5162	H3
92/93	0.00304549	0.0131057	0.0183287	0.0331155	0.0986892	0.180801	0.448412	0.990674	2.86122e-06	0.133812	0.118887	0.148737	-12.8318	B
93/94	0.00238462	0.011368	0.0273834	0.0432395	0.0982866	0.179313	0.530423	0.994891	6.34593e-07	0.140791	0.129192	0.152389	-13.2681	H3
94/95	0.00203946	0.00879785	0.022802	0.0446229	0.080844	0.151473	0.403733	0.993902	9.88288e-07	0.140088	0.127473	0.152703	-13.3933	H3
95/96	0.00281822	0.0059294	0.0216943	0.0383414	0.0552379	0.132938	0.401924	0.983414	1.21008e-05	0.133961	0.113961	0.15396	-13.0638	indeterm
96/97	0.00252253	0.00951268	0.0204248	0.046485	0.103213	0.219997	0.542255	0.998727	1.96525e-08	0.14631	0.140305	0.152316	-13.678	H3
97/98	0.00379741	0.0123177	0.0304717	0.0585756	0.123248	0.2291	0.655321	0.998544	2.7468e-08	0.138231	0.132164	0.144299	-12.851	H3
98/99	0.00361607	0.00831719	0.0180164	0.0387705	0.108542	0.226178	0.681806	0.987541	5.90877e-06	0.145757	0.126936	0.164577	-13.6052	H3

## Sheet: France
	excess All-Cause mortality rate/100,000 age-specific population
year\Age	47.5	52.5	57.5	62.5	67.5	72.5	77.5	82.5	90	R-squared	p-value	exp coeff	LB	UB	mult coeff
68/69	0.00217288	0.00719228	0.0130269	0.0264598	0.0510273	0.104737	0.191532	0.349995	0.720925	0.989886	3.04012e-08	0.133859	0.121766	0.145952	-12.1062
69/70	0.0176815	0.027716	0.0584131	0.101347	0.18744	0.304747	0.395123	0.405135	0.746503	0.95759	4.64897e-06	0.0896314	0.072773	0.10649	-8.04583
70/71	0.00461569	0.00518151	0.00875788	0.0166361	0.0415275	0.0856201	0.185975	0.37939	0.873763	0.986403	8.576e-08	0.134167	0.120088	0.148245	-12.1934
71/72	0.00390439	0.00573508	0.0117858	0.0268551	0.0516846	0.0950738	0.171909	0.290864	0.610153	0.994364	3.91955e-09	0.124241	0.115881	0.1326	-11.4841
72/73	0.00635807	0.0114939	0.0234855	0.0350717	0.0632568	0.120515	0.251364	0.429506	0.834479	0.996985	4.38303e-10	0.117042	0.11129	0.122794	-10.5894
73/74	0.00154327	0.00516583	0.00922314	0.0125467	0.0322284	0.0555072	0.098399	0.222442	0.499262	0.990969	2.04455e-08	0.130932	0.119761	0.142104	-12.3907
74/75	0.00656696	0.00583319	0.0102695	0.0232946	0.0498218	0.0965968	0.174931	0.310928	0.44675	0.973809	8.54993e-07	0.115315	0.0984126	0.132217	-10.8782
75/76	8.21777e-05	0.00172685	0.00772965	0.0109162	0.0313918	0.0642592	0.138362	0.248303	0.698808	0.919266	4.4952e-05	0.188449	0.138536	0.238362	-16.6736
76/77	0.000662201	0.00430215	0.0088208	0.0116214	0.0154609	0.059507	0.114473	0.234298	0.591762	0.968926	1.55824e-06	0.148	0.124312	0.171688	-13.7081
77/78	0.0027488	0.00526367	0.00824843	0.0175491	0.0381233	0.0707057	0.157535	0.298219	0.753228	0.998013	1.01777e-10	0.134967	0.129585	0.140349	-12.3968
78/79	-0.000538625	0.0026972	0.00850437	0.0191978	0.0301882	0.0507101	0.108985	0.221985	0.547621	0.989175	3.98044e-07	0.135184	0.121057	0.149311	-12.6852
79/80	0.0020218	0.00540967	0.00846117	0.00471816	0.0213077	0.0354742	0.0848771	0.172311	0.402831	0.952232	7.06578e-06	0.123386	0.0986874	0.148085	-12.1267
80/81	0.000491948	0.00655758	0.0102633	0.0167482	0.0369865	0.0762758	0.143211	0.291724	0.722471	0.947357	9.94741e-06	0.152281	0.120198	0.184363	-13.731
81/82	0.00216584	0.00315352	0.00504528	0.00812138	0.0218029	0.0414636	0.0887498	0.183965	0.422321	0.990374	2.5562e-08	0.131127	0.119573	0.14268	-12.6631
82/83	0.00319237	0.00592633	0.00795083	0.0116189	0.0192746	0.0466216	0.120576	0.231027	0.555038	0.97912	3.85981e-07	0.124251	0.108035	0.140468	-11.9047
83/84	0.00204994	0.00071661	0.00717678	0.0121101	0.0285454	0.0377376	0.0970475	0.180085	0.448254	0.940228	1.55605e-05	0.143171	0.110908	0.175433	-13.5325
84/85	0.00468898	0.00772294	0.0079847	0.0170857	0.0269162	0.0628251	0.129875	0.293126	0.751768	0.977588	4.94814e-07	0.123233	0.106557	0.13991	-11.5816
85/86	0.00309624	0.00431134	0.0102301	0.0152211	0.0244324	0.0602125	0.141601	0.287582	0.751467	0.990671	2.29094e-08	0.133034	0.121495	0.144572	-12.35
86/87	0.000522866	0.00203013	0.00438973	0.00883466	0.0150296	0.0375618	0.0744561	0.172405	0.392845	0.990773	2.20379e-08	0.151087	0.138056	0.164118	-14.3168
87/88	-0.00133043	0.00207105	0.00402956	0.00850213	0.015129	0.0281638	0.0623716	0.151933	0.445294	0.997047	8.05473e-09	0.142718	0.13496	0.150477	-13.7462
88/89	0.0011717	0.00460066	0.0043344	0.00886544	0.0144356	0.03215	0.0771414	0.136123	0.396473	0.983059	1.85385e-07	0.130858	0.115505	0.146211	-12.8088
89/90	0.00203847	0.00423824	0.00712178	0.0158917	0.0315751	0.0448632	0.13634	0.275397	0.745122	0.995287	2.09485e-09	0.138999	0.130451	0.147548	-12.8522
90/91	-0.000728208	0.00131613	0.00741467	0.0102145	0.021343	0.027625	0.058815	0.150129	0.453254	0.970041	8.49879e-06	0.140576	0.115897	0.165255	-13.5188
91/92	0.000594793	0.0040113	0.00796117	0.0117877	0.0207186	0.0308878	0.0888176	0.182644	0.533432	0.968199	1.69014e-06	0.143454	0.120218	0.16669	-13.5377
92/93	0.00105081	0.00256651	0.00449344	0.0082825	0.0141989	0.0300271	0.0775484	0.160617	0.451483	0.995764	1.44173e-09	0.140908	0.132695	0.149122	-13.5464
93/94	-0.000284512	0.00208489	0.00675851	0.00931495	0.0155114	0.0405365	0.100221	0.181639	0.475273	0.989897	3.23524e-07	0.142869	0.12845	0.157287	-13.5418
94/95	-0.000678496	0.00132577	0.00318051	0.00875613	0.0113552	0.0218699	0.0373758	0.119714	0.302627	0.987358	6.34374e-07	0.13987	0.12406	0.15568	-13.8366
95/96	0.00291036	0.00388083	0.00797014	0.0139267	0.0235443	0.0439088	0.0653838	0.184548	0.488736	0.990477	2.46198e-08	0.121098	0.110486	0.131711	-11.8195
96/97	0.00212825	0.00287721	0.00803115	0.0159383	0.0318467	0.0527409	0.0962083	0.280234	0.787862	0.99365	5.95379e-09	0.140649	0.1306	0.150698	-13.0002
97/98	0.00201347	0.00338062	0.00228516	0.0140016	0.0185147	0.0399682	0.072649	0.198161	0.559078	0.96505	2.35502e-06	0.137968	0.114502	0.161434	-13.1599
98/99	0.00239696	0.00453005	0.00517356	0.0143496	0.02622	0.0467932	0.107878	0.218762	0.66193	0.991023	2.00156e-08	0.133689	0.122318	0.145061	-12.5946

## Sheet: Japan
	excess All-Cause mortality rate/100,000 age-specific population
year\age	47.5	52.5	57.5	62.5	67.5	72.5	77.5	82.5	87.5	92.5	R2	p-value	exp coeff	LB	UB	mult coeff	dominant virus
51/52	0.0112599	0.0170841	0.0358275	0.0578242	0.11828	0.209336	0.378662	0.624471	1.25015	1.9413	0.998499	1.38789e-12	0.117412	0.113701	0.121123	-10.1174
52/53	0.0132863	0.024613	0.045265	0.095603	0.223768	0.475845	0.915776	1.35661	2.44516	3.0283	0.987476	6.76049e-09	0.127971	0.116221	0.139721	-10.3067
53/54	0.00655551	0.0169841	0.0329087	0.0561102	0.0947618	0.179161	0.315453	0.530423	0.986371	1.83663	0.996179	5.83551e-11	0.11976	0.113713	0.125807	-10.4491
54/55	0.00732719	0.0155297	0.0233754	0.0537733	0.0984014	0.179538	0.32134	0.492736	0.926187	1.61345	0.996994	2.234e-11	0.11929	0.11395	0.12463	-10.4745
55/56	0.00946822	0.0180356	0.0294747	0.0569679	0.106511	0.210928	0.3742	0.641487	1.14872	2.39129	0.999267	7.91589e-14	0.121906	0.119213	0.124599	-10.4608
56/57	0.0169015	0.0256424	0.0516449	0.0924406	0.199458	0.39298	0.772439	1.36189	2.21212	4.06748	0.997475	1.11289e-11	0.126035	0.120865	0.131205	-10.1614	H1-like
57/58	0.013086	0.0217159	0.0364083	0.0633451	0.129948	0.230105	0.427097	0.673343	1.06682	1.99967	0.99813	3.3471e-12	0.11322	0.109224	0.117215	-9.74913	H2
58/59	0.00856071	0.0163339	0.0321591	0.0561069	0.101339	0.177317	0.342814	0.634407	0.875699	1.86113	0.998046	3.99225e-12	0.117788	0.113538	0.122037	-10.2697	H2
59/60	0.0131059	0.0250078	0.0473449	0.0890468	0.149373	0.303644	0.564606	0.929713	1.44902	2.84691	0.998209	2.81741e-12	0.118781	0.114678	0.122883	-9.89613	interstitial
60/61	0.0105391	0.0186788	0.0409328	0.0762238	0.133012	0.249602	0.507319	0.886427	1.5075	2.58448	0.998346	2.05014e-12	0.12361	0.119507	0.127712	-10.3678	interstitial
61/62	0.013723	0.0239514	0.0432046	0.0866605	0.18214	0.360824	0.717012	1.23901	2.0142	2.92335	0.994693	2.1736e-10	0.124946	0.117505	0.132386	-10.2137	H1-like
62/63	0.00968783	0.0169372	0.0283457	0.0662747	0.110546	0.208	0.409678	0.773124	1.30122	1.89693	0.996819	2.80476e-11	0.121846	0.116234	0.127458	-10.4306	H2-like
63/64	0.00501936	0.0128551	0.02504	0.0498816	0.0918081	0.184062	0.359358	0.648064	1.09109	1.60481	0.993593	4.61923e-10	0.128365	0.119961	0.136769	-11.1168	H2-like
64/65	0.0117628	0.0161837	0.0359929	0.0710297	0.147728	0.285514	0.592456	1.10975	1.80002	2.68118	0.99449	2.52601e-10	0.128452	0.120657	0.136248	-10.646	H1-like
65/66	0.00590944	0.0110327	0.0231004	0.0456788	0.094581	0.181069	0.352429	0.60525	1.048	1.54622	0.995152	1.51376e-10	0.12742	0.120169	0.134671	-11.0819	H2-like
66/67	0.00639274	0.0121239	0.0236873	0.0438764	0.09009	0.198157	0.34593	0.68539	1.1457	1.81103	0.997211	1.65524e-11	0.129049	0.123486	0.134613	-11.1403	H2-like
67/68	0.00849812	0.0134628	0.031534	0.0571588	0.120727	0.249878	0.51602	0.988859	1.84573	2.96059	0.997768	6.78713e-12	0.135349	0.13013	0.140567	-11.2611	H1-like
68/69	0.00774594	0.0111985	0.024625	0.0448122	0.097469	0.200433	0.362764	0.655208	1.21122	1.91665	0.99682	2.80128e-11	0.128296	0.122388	0.134204	-11.0506
69/70	0.0108338	0.0163307	0.0356444	0.0711978	0.143474	0.285952	0.469923	0.743643	1.38075	2.12204	0.994306	2.88082e-10	0.12139	0.1139	0.128879	-10.2765
70/71	0.00474618	0.00905784	0.0162088	0.0300161	0.0681618	0.143213	0.28177	0.529079	0.914692	1.45157	0.996968	2.31357e-11	0.131831	0.125904	0.137758	-11.6219
71/72	0.00271284	0.00641431	0.0112574	0.0285798	0.0543304	0.131024	0.249181	0.431043	0.78838	1.36457	0.995258	1.38573e-10	0.139765	0.131899	0.147631	-12.3942
72/73	0.00592654	0.00853541	0.0128106	0.0280623	0.059062	0.119388	0.243725	0.459655	0.815892	1.51987	0.995164	1.49901e-10	0.129699	0.122328	0.137071	-11.5548
73/74	0.00553301	0.00802315	0.0189477	0.0322755	0.0684467	0.14423	0.294559	0.563633	0.989223	1.87913	0.997884	5.48417e-12	0.134036	0.129004	0.139068	-11.7052
74/75	0.00649654	0.00802458	0.0151903	0.0292162	0.0585357	0.131283	0.258823	0.521111	0.952934	1.72823	0.994634	2.27109e-10	0.1318	0.123908	0.139692	-11.6218
75/76	0.00553862	0.00915569	0.014234	0.0335482	0.0625426	0.145093	0.309059	0.6044	1.21961	2.24063	0.996668	3.37441e-11	0.138862	0.132316	0.145408	-12.0121
76/77	0.00418645	0.00472315	0.0117616	0.0189794	0.0488381	0.0906173	0.20352	0.425941	0.75741	1.51307	0.993832	3.96634e-10	0.138449	0.129557	0.147341	-12.3881
77/78	0.00358839	0.00625294	0.0109187	0.0174397	0.0391825	0.0882814	0.196924	0.337223	0.664031	1.25165	0.996075	6.49831e-11	0.133958	0.127103	0.140814	-12.1598
78/79	0.00294488	0.00555829	0.00771984	0.0107956	0.025265	0.0493491	0.110119	0.200194	0.379365	0.66968	0.991544	1.40298e-09	0.124137	0.11479	0.133483	-11.919
79/80	0.0049092	0.00776869	0.0113357	0.0193371	0.0419193	0.0872668	0.187154	0.373789	0.69979	1.40289	0.992602	8.21362e-10	0.130224	0.121059	0.13939	-11.8049
80/81	0.00442411	0.00510695	0.00771566	0.0166854	0.0351094	0.0699585	0.166617	0.325063	0.619965	1.25648	0.988862	4.22634e-09	0.134302	0.122681	0.145922	-12.2849
81/82	0.00400263	0.00755376	0.00914851	0.0128447	0.033736	0.074761	0.171226	0.343563	0.632024	1.02973	0.984358	1.64729e-08	0.130467	0.117058	0.143876	-12.0032
82/83	0.00495641	0.0074374	0.0101073	0.0193254	0.03311	0.0796042	0.163642	0.374563	0.745593	1.35486	0.98757	6.55948e-09	0.130986	0.119005	0.142967	-11.9159
83/84	0.00433377	0.00406044	0.00810824	0.0118735	0.0275968	0.0565739	0.142299	0.304702	0.575858	1.07966	0.98199	2.89778e-08	0.134117	0.119309	0.148925	-12.415
84/85	0.00464754	0.00574619	0.00703258	0.0132836	0.0295599	0.057074	0.128838	0.278657	0.528856	0.984607	0.981949	2.92427e-08	0.128361	0.114172	0.14255	-12.0046
85/86	0.00254894	0.00467885	0.00759629	0.0128701	0.0217839	0.0455304	0.122392	0.291577	0.565151	1.07964	0.989782	2.99321e-09	0.138015	0.126582	0.149447	-12.7935
86/87	0.00308057	0.00404545	0.00562477	0.0098525	0.0188339	0.0451926	0.0995617	0.196547	0.416376	0.679935	0.984722	1.49883e-08	0.129242	0.116118	0.142367	-12.3834
87/88	0.00266545	0.00545923	0.00935234	0.0111695	0.0219866	0.0489031	0.106713	0.226017	0.488061	0.848851	0.988426	4.92954e-09	0.129232	0.117831	0.140634	-12.218
88/89	0.00316162	0.0043717	0.006418	0.00927739	0.0202591	0.0416836	0.0988534	0.205567	0.437429	0.8853	0.981836	2.99855e-08	0.130861	0.116349	0.145372	-12.4421
89/90	0.00233874	0.00588432	0.00815679	0.0142287	0.0287345	0.0601038	0.1312	0.268007	0.561836	1.08022	0.995375	1.25358e-10	0.135885	0.128333	0.143437	-12.5595
90/91	0.00276755	0.0049109	0.0076953	0.0110161	0.0190218	0.0397663	0.0946825	0.188026	0.389406	0.711052	0.988163	5.39399e-09	0.12562	0.11441	0.136829	-12.1007
91/92	0.00133408	0.00515181	0.00878848	0.0100623	0.0169975	0.0391191	0.0858313	0.206444	0.397734	0.886368	0.982451	2.61164e-08	0.13589	0.121083	0.150697	-12.8748
92/93	0.00289521	0.00483398	0.00885826	0.0142839	0.0287549	0.0540563	0.122968	0.26444	0.469395	0.989585	0.996001	7.00563e-11	0.131656	0.124855	0.138458	-12.2968
93/94	0.00225102	0.00419511	0.00749231	0.0102461	0.0195587	0.0366133	0.0852006	0.195112	0.368629	0.784729	0.990371	2.35976e-09	0.129817	0.119381	0.140254	-12.4475
94/95	0.00477803	0.00838416	0.0151435	0.0245786	0.0408207	0.0778323	0.158553	0.309043	0.593828	1.18383	0.996604	3.6416e-11	0.122071	0.116261	0.127881	-11.2587
95/96	0.00292199	0.00376056	0.00701355	0.0153349	0.0219767	0.0372967	0.0790585	0.193453	0.375298	0.782924	0.990008	2.73712e-09	0.126772	0.116388	0.137156	-12.1808
96/97	0.00303698	0.00491003	0.0104936	0.0174535	0.0255269	0.0564056	0.114326	0.252926	0.506108	0.947893	0.994948	1.78463e-10	0.129206	0.1217	0.136712	-12.0996
97/98	0.00277796	0.00492361	0.00639464	0.0135144	0.0241324	0.0483907	0.0825028	0.208173	0.373073	0.758869	0.993151	6.03397e-10	0.126409	0.11785	0.134967	-12.1119
98/99	0.00258924	0.00617198	0.0115935	0.0197159	0.0374429	0.0710197	0.136901	0.300156	0.591739	1.13227	0.998446	1.5965e-12	0.132511	0.128249	0.136774	-12.1701
99/00	0.00272726	0.00455479	0.00836578	0.0146434	0.0263079	0.0503378	0.0986893	0.216364	0.42495	0.86139	0.996896	2.5401e-11	0.128721	0.122865	0.134576	-12.1886
00/01	0.00228745	0.00431968	0.00824235	0.0115045	0.0220031	0.0380857	0.0678008	0.146156	0.308932	0.624811	0.994263	2.96915e-10	0.121985	0.11443	0.12954	-11.9526

## Sheet: UK
	excess All-Cause mortality rate/100,000 age-specific population
year\Age	47.5	52.5	57.5	62.5	67.5	72.5	77.5	82.5	90	R-squared	p-value	exp coeff	LB	UB	mult coeff
59/60	0.0102351	0.0161083	0.0312519	0.0582686	0.100681	0.180373	0.321846	0.587145	1.14359	0.998353	5.28108e-11	0.114152	0.110008	0.118296	-10.0213
60/61	0.0140824	0.024848	0.0548061	0.107381	0.177581	0.329737	0.531492	0.920501	1.892	0.99467	3.22443e-09	0.116197	0.108595	0.123799	-9.65426
61/62	0.0132015	0.0220084	0.0495578	0.0980844	0.16681	0.286758	0.510634	0.926533	1.83823	0.995585	1.66687e-09	0.118128	0.111098	0.125159	-9.85645
62/63	0.0145922	0.0287132	0.0549505	0.114929	0.184432	0.356241	0.669268	1.23555	2.41265	0.997012	4.25079e-10	0.121812	0.115852	0.127773	-9.90887
63/64	0.00756562	0.0157903	0.0322747	0.068049	0.103042	0.193746	0.384887	0.613659	1.24434	0.993897	5.1811e-09	0.120305	0.11188	0.128731	-10.4087
64/65	0.00656822	0.0176006	0.0265812	0.0617455	0.0833541	0.164909	0.287338	0.527411	1.02907	0.991984	1.34603e-08	0.116395	0.107044	0.125746	-10.2915
65/66	0.00581428	0.0176702	0.034277	0.0661754	0.114269	0.210027	0.401717	0.696213	1.42882	0.989596	3.3563e-08	0.125816	0.114287	0.137346	-10.7408
66/67	0.00392677	0.0093427	0.0224364	0.0394455	0.0563953	0.106465	0.205669	0.356013	0.723003	0.990046	2.8744e-08	0.119743	0.109012	0.130474	-10.9267
67/68	0.00830528	0.0169269	0.0397791	0.0692963	0.126935	0.240102	0.474513	0.867346	1.89459	0.997026	4.18011e-10	0.127922	0.121677	0.134166	-10.7261
68/69	0.011632	0.0184423	0.0356444	0.0666939	0.115071	0.18938	0.326318	0.514251	1.08616	0.997524	2.19975e-10	0.108238	0.103418	0.113057	-9.56027
69/70	0.0186717	0.0305073	0.0589395	0.116821	0.220699	0.356733	0.431539	0.491012	1.05698	0.966408	2.04876e-06	0.0950507	0.0792126	0.110889	-8.2742
70/71	0.00629636	0.0118224	0.0180191	0.0415041	0.0686269	0.127513	0.213757	0.382292	0.862864	0.998063	9.31225e-11	0.116607	0.112016	0.121198	-10.5805
71/72	0.00895844	0.0160555	0.0267787	0.0495957	0.108083	0.172305	0.287497	0.403952	0.835796	0.992565	1.03425e-08	0.108785	0.100371	0.1172	-9.79395
72/73	0.0108266	0.0169944	0.0286899	0.0498884	0.0934346	0.169952	0.297227	0.485306	0.960669	0.998015	1.01494e-10	0.109188	0.104835	0.11354	-9.7637
73/74	0.00671435	0.0107839	0.0202874	0.0390064	0.0664788	0.123906	0.213587	0.384327	0.837426	0.999189	4.41991e-12	0.115666	0.112721	0.118611	-10.5231
74/75	0.00386721	0.0110756	0.0159225	0.0336854	0.0593567	0.108425	0.176707	0.340092	0.755076	0.994154	4.45578e-09	0.120338	0.112091	0.128586	-11.0149
75/76	0.00758019	0.0163357	0.0284281	0.0569961	0.092886	0.158725	0.322514	0.607828	1.43991	0.998587	3.08735e-11	0.121647	0.117557	0.125736	-10.5676
76/77	0.00811715	0.0112825	0.0195024	0.0411497	0.078553	0.127803	0.224587	0.422948	0.930396	0.997005	4.28537e-10	0.115618	0.109954	0.121282	-10.4422
77/78	0.00593699	0.0120862	0.0161582	0.0376961	0.0718569	0.124436	0.222739	0.388474	0.922735	0.99705	4.06353e-10	0.119398	0.113594	0.125203	-10.7804
78/79	0.00731686	0.0155107	0.0243872	0.0457329	0.0849983	0.158069	0.277591	0.462081	1.05898	0.998609	2.92336e-11	0.11662	0.11273	0.12051	-10.3696
79/80	0.00476558	0.00966582	0.0199927	0.0251658	0.0562146	0.0900251	0.180896	0.299268	0.699343	0.996197	9.88981e-10	0.115867	0.109469	0.122266	-10.7577
80/81	0.00601019	0.00942985	0.0172177	0.0266057	0.0483281	0.0861021	0.174289	0.314132	0.753063	0.997448	2.44757e-10	0.115084	0.109881	0.120287	-10.7043
81/82	0.00518032	0.00992803	0.0196609	0.0403982	0.0664076	0.127228	0.246994	0.43033	0.995935	0.998592	3.04803e-11	0.124208	0.12004	0.128376	-11.0889
82/83	0.00388901	0.00942044	0.0201401	0.0276105	0.0770513	0.115672	0.22734	0.413494	0.969411	0.993887	5.21064e-09	0.127878	0.118915	0.136842	-11.4256
83/84	0.0035601	0.00878927	0.0170778	0.0219531	0.0571726	0.0941765	0.155298	0.291983	0.70858	0.993846	5.33366e-09	0.121074	0.112559	0.129589	-11.1976
84/85	0.0031089	0.00943227	0.0218853	0.0401132	0.0608362	0.131195	0.232456	0.441354	0.956183	0.988401	4.91287e-08	0.129888	0.117312	0.142463	-11.5399
85/86	0.00403273	0.00957383	0.0199076	0.036481	0.0687953	0.129353	0.254444	0.462549	1.06386	0.997146	3.61741e-10	0.12977	0.123565	0.135974	-11.4832
86/87	0.00124196	0.00795427	0.0147221	0.024314	0.0291773	0.0814753	0.133844	0.238898	0.519241	0.958456	4.32363e-06	0.128586	0.10466	0.152512	-12.0042
87/88	0.00304125	0.00263139	0.0116297	0.0240565	0.0437626	0.0873493	0.147051	0.25486	0.628952	0.978467	4.2997e-07	0.133296	0.115623	0.150969	-12.2825
88/89	0.00306637	0.00567178	0.0108362	0.0223687	0.0360699	0.0846089	0.116734	0.219323	0.408107	0.993178	7.6518e-09	0.117754	0.109032	0.126476	-11.2742
89/90	0.00441717	0.00744971	0.0178338	0.0366745	0.0811034	0.144431	0.272391	0.504451	1.22696	0.99663	6.47581e-10	0.135172	0.128146	0.142197	-11.8151
90/91	0.00349558	0.00640669	0.0129629	0.0274552	0.0567354	0.0901697	0.18033	0.335671	0.749069	0.997433	2.49619e-10	0.12817	0.122358	0.133981	-11.6889
91/92	0.00137124	0.00764341	0.0119788	0.0240185	0.051289	0.0788929	0.168355	0.284523	0.67695	0.975078	7.18168e-07	0.135545	0.116178	0.154912	-12.3601
92/93	0.00432719	0.00808612	0.010199	0.0219251	0.0465127	0.0320662	0.127918	0.203544	0.46164	0.969185	1.51316e-06	0.109161	0.0917644	0.126557	-10.687
93/94	0.00501138	0.00495282	0.0134692	0.0264876	0.0554774	0.0984811	0.171309	0.304603	0.777122	0.990323	2.60442e-08	0.125513	0.114424	0.136602	-11.5022
94/95	0.00206514	0.00387542	0.00955313	0.0167507	0.0372571	0.079479	0.0947422	0.232597	0.479841	0.991366	1.74636e-08	0.129454	0.118657	0.140252	-12.2016
95/96	0.00537265	0.00881599	0.0104677	0.028462	0.0487337	0.106415	0.193167	0.354388	0.783729	0.991436	1.69747e-08	0.123007	0.112789	0.133225	-11.2553
96/97	0.00433078	0.00638706	0.0164838	0.0334855	0.0543657	0.123257	0.222593	0.467139	1.11303	0.997032	4.14848e-10	0.134015	0.127481	0.14055	-11.8788
97/98	0.000397288	0.00365828	0.0081503	0.0155926	0.0342071	0.0635155	0.0937135	0.219813	0.483595	0.949177	8.78855e-06	0.150951	0.119733	0.18217	-13.9148
98/99	0.00361493	0.0085508	0.01212	0.0257228	0.0543514	0.103336	0.207327	0.392485	0.978122	0.997858	1.3252e-10	0.132023	0.126556	0.13749	-11.8561
99/00	0.00539666	0.00824032	0.0192233	0.0363192	0.0703479	0.138414	0.26042	0.447147	1.11568	0.997947	1.1418e-10	0.12844	0.123233	0.133646	-11.3676

## Sheet: US
	excess All-Cause mortality rate/100,000 age-specific population
year	50	60	67.5	72.5	77.5	82.5	87.5	95	R-squared	p-value	exp coeff	LB	UB	mult coeff	dominant virus
59/60	NA	0.0338658	0.0760121	0.129681	0.198895	0.323039	0.578435	1.18381	0.99911	8.03181e-09	0.100933	0.097469	0.104396	-9.41207	H2
60/61	NA	0.0189251	0.0360527	0.0634075	0.0965674	0.189884	0.340931	0.672926	0.996326	2.7813e-07	0.104865	0.0975447	0.112186	-10.3441	B
61/62	NA	0.0232359	0.0471528	0.0780303	0.15339	0.268284	0.527311	0.882742	0.993607	1.11196e-06	0.108953	0.0989065	0.119	-10.347	B
62/63	NA	0.0358545	0.0658442	0.122252	0.19913	0.368795	0.645336	1.29925	0.997255	1.34158e-07	0.105706	0.0993311	0.112082	-9.75482	H2
63/64	NA	0.0215077	0.0452405	0.0585227	0.126281	0.231771	0.41043	0.749593	0.990639	2.88847e-06	0.105598	0.0937974	0.117399	-10.2529	B
64/65	NA	0.020388	0.0394209	0.0710771	0.120974	0.231602	0.441895	0.788301	0.995122	5.65197e-07	0.109026	0.100251	0.117802	-10.5067	B
65/66	NA	0.0174207	0.0404025	0.0582919	0.114666	0.189884	0.35055	0.686817	0.997412	1.15771e-07	0.10645	0.100217	0.112683	-10.443	B
66/67	NA	0.0141179	0.0248651	0.052769	0.0739529	0.146056	0.24826	0.629843	0.993769	1.04308e-06	0.109642	0.0996607	0.119623	-10.9658	B
67/68	0.00749858	0.0243753	0.0536129	0.084721	0.180345	0.318715	0.65688	1.23731	0.997104	7.60062e-09	0.115665	0.109438	0.121892	-10.6996	H2
68/69	0.0144229	0.0366986	0.074178	0.116029	0.136854	0.224541	0.379688	0.676757	0.995114	3.65139e-08	0.0841896	0.0782967	0.0900826	-8.37806	H3
69/70	0.010236	0.0299341	0.0580458	0.0813003	0.121596	0.189116	0.30039	0.498442	0.9957	2.4893e-08	0.0854504	0.0798406	0.0910602	-8.71887	H3
70/71	0.00471649	0.0151978	0.0334898	0.0598168	0.0947317	0.157441	0.296887	0.578889	0.998778	5.7071e-10	0.106993	0.103254	0.110732	-10.6399	B
71/72	0.00978665	0.0300304	0.0646103	0.10022	0.165946	0.192533	0.302106	0.530181	0.985767	9.05921e-07	0.0870751	0.0766231	0.0975272	-8.75472	H3
72/73	0.00913474	0.0241863	0.0500255	0.079786	0.142082	0.234307	0.336064	0.619671	0.997586	4.39973e-09	0.0953955	0.0907078	0.100083	-9.4298	H3
73/74	0.00330467	0.0147247	0.0299919	0.050834	0.0854069	0.160935	0.271439	0.447116	0.991032	2.26131e-07	0.109059	0.0986956	0.119422	-10.9289	B
74/75	0.00629034	0.0180135	0.0406853	0.0731195	0.120748	0.224075	0.302248	0.554108	0.994413	5.46031e-08	0.101813	0.0941901	0.109437	-10.0778	H3
75/76	0.00636294	0.0196765	0.0397479	0.0649219	0.125059	0.237945	0.438558	0.865847	0.997512	4.81813e-09	0.110797	0.105269	0.116325	-10.6337	H3
76/77	0.00416928	0.0147871	0.0284975	0.0514832	0.0835546	0.170127	0.271173	0.498732	0.996556	1.27822e-08	0.10717	0.100876	0.113464	-10.7454	B (H3)
77/78	0.00852835	0.0229671	0.0475835	0.0829965	0.141036	0.244642	0.452654	0.82619	0.998598	8.61959e-10	0.103924	0.100033	0.107814	-10.0001	H3
78/79	0.00442151	0.0106862	0.0199393	0.0333068	0.0574221	0.113443	0.178796	0.346366	0.995829	2.27082e-08	0.0996471	0.0932051	0.106089	-10.5173	H1
79/80	0.00446622	0.0125706	0.0299031	0.047041	0.100573	0.188697	0.357762	0.759043	0.997216	6.74957e-09	0.116668	0.11051	0.122826	-11.3426	B
80/81	0.00686868	0.0202526	0.0439982	0.0718237	0.134367	0.265308	0.491063	0.980084	0.997753	3.54956e-09	0.112266	0.106943	0.117588	-10.652	H3
81/82	0.00353619	0.0097361	0.0246749	0.0445341	0.0739145	0.130737	0.232524	0.412668	0.997247	6.52854e-09	0.108981	0.10326	0.114701	-11.0818	H1&B
82/83	0.00366528	0.011666	0.0237757	0.0460951	0.0731331	0.157127	0.279166	0.556383	0.997699	3.80913e-09	0.11327	0.107836	0.118703	-11.2884	H3
83/84	0.00301691	0.0145991	0.0273215	0.0461643	0.0829404	0.141741	0.286831	0.563203	0.994052	6.59186e-08	0.114031	0.105219	0.122842	-11.3176	H1&B
84/85	0.00497298	0.0176513	0.0355511	0.064654	0.117207	0.224718	0.399636	0.817545	0.998531	9.91468e-10	0.11411	0.109738	0.118482	-10.972	H3
85/86	0.0045435	0.0158299	0.0358782	0.0582453	0.101161	0.18499	0.351508	0.699778	0.998664	7.45029e-10	0.112169	0.108071	0.116267	-10.9452	B (H3)
86/87	0.0036559	0.0118953	0.0285739	0.043599	0.0844613	0.145812	0.230657	0.541995	0.999028	2.8705e-10	0.110224	0.10679	0.113659	-11.0629	H1
87/88	0.00396263	0.0142505	0.030086	0.0518005	0.0939086	0.193068	0.363375	0.760112	0.998165	1.93088e-09	0.117374	0.112347	0.122401	-11.3847	H3
88/89	0.00398316	0.0140337	0.0292619	0.0473637	0.0900442	0.163723	0.299406	0.690513	0.998787	5.58584e-10	0.113693	0.109734	0.117652	-11.1907	H1&B
89/90	0.00491344	0.017963	0.0394686	0.0674985	0.124169	0.222767	0.414468	0.813434	0.998443	1.18134e-09	0.114107	0.109605	0.118609	-10.9437	H3
90/91	0.00189027	0.0125147	0.0242682	0.041558	0.0653252	0.128262	0.227689	0.487485	0.986632	7.50312e-07	0.11817	0.10443	0.131911	-11.8178	B
91/92	0.00412692	0.0148266	0.0285117	0.0504238	0.0807947	0.167841	0.299048	0.594166	0.997324	5.9922e-09	0.110662	0.104936	0.116388	-10.9811	H3
92/93	0.00282618	0.01394	0.0293926	0.0505129	0.0925613	0.173129	0.339154	0.659048	0.99485	4.27644e-08	0.12013	0.111496	0.128764	-11.6841	B (H3)
93/94	0.0044598	0.0156937	0.0351801	0.0606792	0.107036	0.206905	0.393745	0.746893	0.998305	1.52305e-09	0.114934	0.110203	0.119665	-11.105	H3
94/95	0.002937	0.0117529	0.0257276	0.045294	0.0801008	0.14217	0.285747	0.494449	0.995874	2.19887e-08	0.114961	0.107569	0.122354	-11.4485	H3
95/96	0.00306757	0.013738	0.0283812	0.0501587	0.0849979	0.161471	0.319871	0.564557	0.994951	4.03046e-08	0.115596	0.10737	0.123822	-11.3887	H1&B
96/97	0.00340057	0.0129681	0.0317112	0.0538109	0.102751	0.193476	0.372001	0.671724	0.996895	9.36512e-09	0.119267	0.112618	0.125916	-11.5467	H3
97/98	0.00373321	0.0162855	0.0307673	0.0589652	0.102165	0.209214	0.422077	0.785848	0.995599	2.66899e-08	0.119556	0.111615	0.127497	-11.4769	H3
98/99	0.00423054	0.015655	0.0330253	0.0602746	0.107486	0.204731	0.415411	0.744694	0.997203	6.8425e-09	0.116707	0.110533	0.122881	-11.2485	H3
